# Supplementary material for: Integrated reduced graphene oxide multilayer/Li composite anode for rechargeable lithium metal batteries
Source: Royal Society of Chemistry journal article supplement (doi:10.1039/c5ra25553h), 2016-01-01
Supplement: c5ra25553h1.pdf [file c5ra25553h1.pdf]

## Supporting Information

### **Integrated reduced graphene oxide multilayer /Li composite anode for rechargeable lithium metal batteries**

Yi-jun Zhang, Xin-hui Xia, Dong-huang Wang, Xiu-li Wang, Chang-dong Gu, and  
Jiang-ping Tu\*

*State Key Laboratory of Silicon Materials, Key Laboratory of Advanced Materials and  
Applications for Batteries of Zhejiang Province, and School of Materials Science and Engineering,  
Zhejiang University, Hangzhou 310027, China*

\*Corresponding author: Tel.: +86-571-87952856; Fax: +86-571-87952573.

*E-mail address:* [tujp@zju.edu.cn](mailto:tujp@zju.edu.cn); [tujplab@zju.edu.cn](mailto:tujplab@zju.edu.cn) (J.P. Tu)

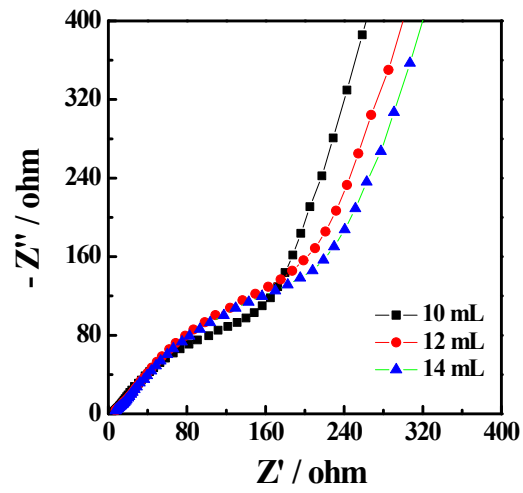

**Figure S1.** The Nyquist plots of Li/rGO anodes fabricated by different thickness of rGO film.

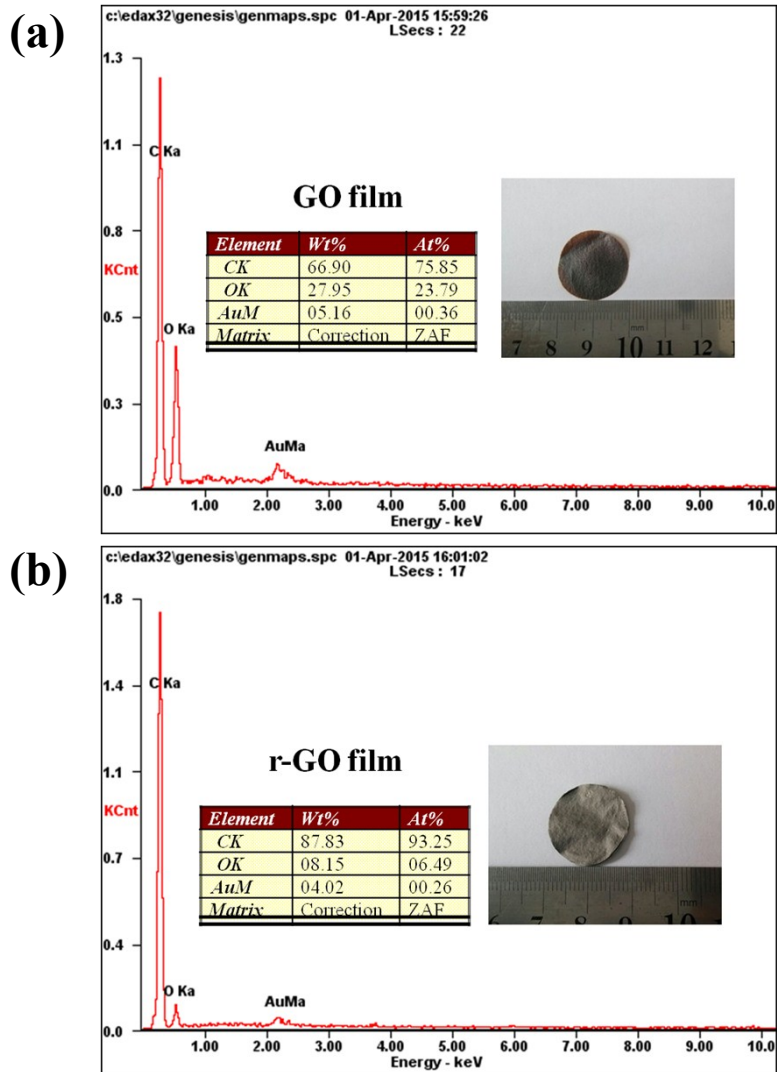

Figure S2. EDS mapping patterns and photographs of (a) GO and (b) rGO films.
